# Supplementary material for: The Equity Tool for Valuing Global Health Partnerships
Source: PubMed Central journal article supplement (PMC9053142; doi:10.9745/ghsp-d-21-00316), 2022-04-28
Supplement: 21-00316-Larson-Supplement2.pdf [file 21-00316-Larson-Supplement2.pdf]

**Supplement to:** Larson CP, Plamondon KM, Dubent L, et al. The Equity Tool for valuing global health partnerships. *Glob Health Sci Pract.* 2022;10(2): e2100316. <https://doi.org/10.9745/GHSP-D-21-00316>

## Supplement 2. Characteristics and Overview of Included Articles

CB=Capacity Building; SD=Sustainable Development; R=Research

| <b>First Author Year</b> | <b>GHP Type</b> | <b>Narrative Description of GHP(s) Assessed</b>                                                                                                                          | <b>Partnership Evaluation Framework Used</b>                                      | <b>Primary Methodology (Methods)</b>                                                                        |
|--------------------------|-----------------|--------------------------------------------------------------------------------------------------------------------------------------------------------------------------|-----------------------------------------------------------------------------------|-------------------------------------------------------------------------------------------------------------|
| Beran [1]<br>2016        | CB-SD-R         | Northern University partnering with Southern Health Systems, NGOs, professional associations, and universities                                                           | Selected elements of the Emerson (2011) Collaborative Governance Framework (CITE) | Retrospective analysis using a collaborative governance framework                                           |
| Birch [2]<br>2013        | CB-R            | A North-South research and clinical partnership in a graduate nursing program                                                                                            | Mercer (2008) tool for assessing participatory research projects                  | Mixed methods (literature review + case study using interviews)                                             |
| Bruen [3]<br>2014        | SD              | Multilateral public-private partnership with Northern 'funders' and Southern 'recipients'; multi-stakeholder board                                                       | None                                                                              | In-depth discussion of the concept of partnership accountability                                            |
| Buse [4]<br>2011         | SD              | Multi-lateral partnerships, including: health product access; health product development; or global coordination/ financing mechanisms                                   | None                                                                              | Meta-Synthesis of 8 public-domain evaluations of GHPs                                                       |
| Citrin [5]<br>2017       | CB-R            | Northern university partnering with Southern Health System and NGO                                                                                                       | Tropical Health & Education Trust Principles of Partnership Framework             | Review (methods unclear)                                                                                    |
| Coffey [6]<br>2018       | CB-SD           | Healthcare delivery partnership among pharmaceutical companies, academia, International NGOs, UN agencies, and bilateral funders, with implementation in Global South    | Brown's Coalition Functioning                                                     | Mixed methods case study                                                                                    |
| Dean [7]<br>2015         | CB-R            | Northern University partnering with Southern Universities, with funding scheme to facilitate research capacity building and exchange between UK and African universities | None                                                                              | Mixed methods retrospective evaluation (cross-sectional survey + semi-structured interviews + focus groups) |

| <b>First Author Year</b> | <b>GHP Type</b> | <b>Narrative Description of GHP(s) Assessed</b>                                                                                                                                                                           | <b>Partnership Evaluation Framework Used</b>                                          | <b>Primary Methodology (Methods)</b>                                                                                                  |
|--------------------------|-----------------|---------------------------------------------------------------------------------------------------------------------------------------------------------------------------------------------------------------------------|---------------------------------------------------------------------------------------|---------------------------------------------------------------------------------------------------------------------------------------|
| El-Bchearaoui [8] 2017   | SD              | Results-based aid partnership involving philanthropic agencies, international financial institutions, international NGOs, Southern health systems and health professionals, with a topical focus on maternal-child health | PARTNER tool                                                                          | Grounded theory process evaluation (document review + key informant interviews + focus groups + partnership analysis)                 |
| Herrick [9] 2018         | CB-SD           | Northern university and health systems network partnering with Southern university and health systems network                                                                                                             | None                                                                                  | Ethnographic research (methods unclear)                                                                                               |
| John [10] 2016           | R               | Northern universities partnering generally with Southern partners for research purposes                                                                                                                                   | None                                                                                  | Reflective questions asked open-ended questions                                                                                       |
| Kamya [11] 2017          | R               | Public private partnership for health interventions implementation in Global South, with topical focus on vaccines                                                                                                        | Binkerhoff's Assessing and Improving Partnership Relationships and Outcomes framework | Mixed-methods case study (document review + in-depth interviews + social network analysis)                                            |
| Leffers [12] 2011        | CB-SD           | Northern academic and professional nurses going to Southern countries for research, education and electives, or practice (i.e., missions)                                                                                 | Developed a framework                                                                 | Grounded theory                                                                                                                       |
| Lipsky 2016 [13]         | SD              | Northern development agencies partnering with Southern health systems and NGOs, with topical focus on family planning                                                                                                     | Binkerhoff's Assessing and Improving Partnership Relationships and Outcomes framework | Evaluation                                                                                                                            |
| Murphy [14] 2015         | R               | Northern researchers partnering with Southern researchers and research users, generally                                                                                                                                   | Develop a tool                                                                        | Sequential consultation, using 3-day regional workshops in Africa, South Asia, and Latin America + pre- and post- workshop engagement |

**Supplement to:** Larson CP, Plamondon KM, Dubent L, et al. The Equity Tool for valuing global health partnerships. *Glob Health Sci Pract.* 2022;10(2): e2100316. <https://doi.org/10.9745/GHSP-D-21-00316>

| <b>First Author Year</b>  | <b>GHP Type</b> | <b>Narrative Description of GHP(s) Assessed</b>                                                                                                                           | <b>Partnership Evaluation Framework Used</b>             | <b>Primary Methodology (Methods)</b>                                                                                          |
|---------------------------|-----------------|---------------------------------------------------------------------------------------------------------------------------------------------------------------------------|----------------------------------------------------------|-------------------------------------------------------------------------------------------------------------------------------|
| Ndenga [15] 2016          | CB              | Northern universities partnering with Southern universities and health systems, with a topical focus on teaching                                                          | None                                                     | Online survey, regression analysis                                                                                            |
| Neuhann [16] 2017         | SD-R            | Northern funding agency and universities partnering with Southern hospitals, with topical focus on health professional capacity                                           | Capacity WORKS model                                     | Document Analysis                                                                                                             |
| Njelesani [17] 2013       | R               | Northern university and researchers partnering with Southern researchers & NGO, with topical focus on applied health sciences                                             | Global Health Research Initiative Framework (Boutillier) | Retrospective partnership evaluation                                                                                          |
| Pattberg[18] 2016         | SD              | Multi-stakeholder partnerships for 'sustainable development', generally                                                                                                   | Develop nine considerations                              | Unclear ("findings were distilled from the literature" and involved consultation with many major international organizations) |
| Perez-Escamilla [19] 2014 | SD-R            | School-based public-private partnerships led by Northern university, with implementation in Global South                                                                  | Alexander 12 Principles                                  | Qualitative analysis of documents and key informant interviews                                                                |
| Ramaswamy [20] 2016       | SD              | Northern university partnering with international NGO, located in multiple Global South countries, with topical focus on clinical partnerships, training, and development | Kybale Model (internally developed)                      | Case study (document analysis + focus groups + interviews + clinical outcomes data) (unclear methodology)                     |
| Ridde [21] 2011           | R               | Northern universities partnering with Southern universities, generally                                                                                                    | None                                                     | Exploratory qualitative research (focus groups)                                                                               |
| Sandwell [22] 2018        | CB-SD           | North-South professional associations and universities twinning partnership                                                                                               | None                                                     | N/A                                                                                                                           |
| Sriharan [23] 2016        | CB-SD           | Northern universities partnered with Southern hospitals, with topical focus on health professional continuing education                                                   | Develop theory                                           | 2-part Realist Approach: Realist review + Interviews                                                                          |
| Steenhoff [24] 2017       | CB-SD           | Northern academics and health professionals engaged                                                                                                                       | None                                                     | Review + expert panel                                                                                                         |

| <b>First Author Year</b> | <b>GHP Type</b> | <b>Narrative Description of GHP(s) Assessed</b>                                                                                                                 | <b>Partnership Evaluation Framework Used</b>                                                                      | <b>Primary Methodology (Methods)</b>                                                                                                            |
|--------------------------|-----------------|-----------------------------------------------------------------------------------------------------------------------------------------------------------------|-------------------------------------------------------------------------------------------------------------------|-------------------------------------------------------------------------------------------------------------------------------------------------|
|                          |                 | in collaborative initiatives with Global South, generally, with topical focus on pediatrics                                                                     |                                                                                                                   |                                                                                                                                                 |
| Storr [25] 2018          | CB-R            | Northern universities partnering with Southern countries to provide "ethical and sustainable fieldwork experiences" (p. 34) of Northern students                | Working Group for Ethical Guidelines on Global Health Training (WEIGHT) guidelines                                | Quality improvement (unclear methodology)                                                                                                       |
| Theissen [26] 2018       | CB-SD           | Public-private partnership between Southern health system and Northern government and industry, with topical focus on maternal health                           | None                                                                                                              | Qualitative methodology (interviews + focus groups)                                                                                             |
| Underwood [27] 2016      | CB              | Northern university partnering with Southern NGOs to provide Northern midwifery and nursing students community-based learning placements                        | Leffers & Mitchell Framework for Partnership and Sustainability in Global Health                                  | Descriptive exploratory qualitative methods (narrative data)                                                                                    |
| Upvall [28] 2018         | CB-SD           | Southern perspectives on North-South partnerships to provide Northern nursing students international electives in Southern settings                             | Leffers & Mitchell Framework for Partnership and Sustainability in Global Health                                  | Grounded theory                                                                                                                                 |
| Yarmoshuk [29] 2018      | CB              | Northern universities partnering with Southern universities, with a topical focus on capacity building of health professionals and health professional programs | Kernaghan's classification of partnerships                                                                        | Mixed methods (quantitative analysis of 125 distinct partnerships; qualitative analysis of characteristics contributing to partnership's value) |
| Yassi [30] 2014          | CB-R            | Northern universities partnering with Global South health professionals, with topical focus on interventions for infectious disease                             | Medical Research Council Campbell et al. frameworks for design and evaluation of complex interventions for health | Narrative qualitative approach                                                                                                                  |

**Supplement to:** Larson CP, Plamondon KM, Dubent L, et al. The Equity Tool for valuing global health partnerships. *Glob Health Sci Pract.* 2022;10(2): e2100316. <https://doi.org/10.9745/GHSP-D-21-00316>

- 1 Beran D, Aebischer Perone S, Alcoba G, et al. Partnerships in global health and collaborative governance: lessons learnt from the Division of Tropical and Humanitarian Medicine at the Geneva University Hospitals. *Globalization Health* 2016;12(1):14, doi:10.1186/12992-016-0156-x
- 2 Birch AP, Tuck J, Malata A, et al. Assessing global partnerships in graduate nursing. *Nurs Educ Today* 2013;33(11):1288–94, doi:10.1016/j.nedt.2013.03.014
- 3 Bruen C, Brugha R, Kageni A, et al. A concept in flux: Questioning accountability in the context of global health cooperation. *Globalization Health* 2014;10:73 doi:10.1186/s12992-014-0073-9,
- 4 Buse K, Tanaka S. Global public-private health partnerships: lessons learned from ten years of experience and evaluation. *Int Dent J* 2011;61(Suppl 2):2–10 doi:10.1111/j.1875-595x.2011.00034.x
- 5 Citrin D, Mehanni S, Acharya B, et al. Power, potential, and pitfalls in global health academic partnerships: review and reflections on an approach in Nepal. *Global Health Action* 2017;10(1):1367161 doi:10.1080/16549716.2017.1367161
- 6 Coffey PS, Hodgins S, Bishop A. Effective collaboration for scaling up health technologies: A case study of the chlorhexidine for umbilical cordcare experience. *Glob Health Sci Pract* 2018;6(1):178–91.
- 7 Dean L, Njelesani J, Smith H, et al. Promoting sustainable research partnerships: A mixed-method evaluation of a United Kingdom-Africa capacity strengthening award scheme. *Health Res Policy Syst* 2015;13:1–10 doi:10.1186/s12961-015-0071-2
- 8 El Bcheraoui C, Palmisano EB, Dansereau E, et al. Healthy competition drives success in results-based aid: Lessons from the Salud Mesoamérica Initiative. *PLoS One* 2017;12(10):e0187107 doi:10.1371/journal.pone.0187107
- 9 Herrick C, Brooks A. The binds of global health partnership: Working out working together in Sierra Leone. *Med Anthropol Q* 2018;32(4):520–38 doi:10.1111/maq.12462
- 10 John CC, Ayodo G, Musoke P. Successful Global Health Research Partnerships: What Makes Them Work? *Am J Trop Med Hyg* 2016;94(1):5–7 doi:10.4269/ajtmh.15-0611.
- 11 Kanya C, Shearer J, Asiimwe G, Carnahan E, Salisbury N, Waiswa P, et al. Evaluating global health partnerships: A case study of a Gavi HPV vaccine application process in Uganda. *Int J Heal Policy Manag.* 2016;6(6):327–38.
- 12 Leffers J, Mitchell E. Conceptual model for partnership and sustainability in global health. *Public Health Nurs.* 2011;28(1):91–102.
- 13 Lipsky AB, Gribble JN, Cahaelen L, Sharma S. Partnerships for policy development: A case study from Uganda’s Costed implementation Plan for Family Planning. *Glob Heal Sci Pract.* 2016;4(2):284–99.
- 14 Murphy J, Hatfield J, Afsana A, et al. Making a commitment to ethics in global health research partnerships: a practical tool to support ethical practice. *J Bioethic Inq* 2015;12:137-146.
- 15 Ndenga E, Uwizeye G, Thomson DR, Uwitonze E, Mubiligi J, Hedt-Gauthier BL, et al. Assessing the twinning model in the Rwandan Human Resources for Health Program: Goal setting, satisfaction and perceived skill transfer. *Glob Heal.* 2016;12:4.
- 16 Neuhann F, Barteit S. Lessons learnt from the MAGNET Malawian-German Hospital Partnership: the German perspective on contributions to patient care and capacity development. *Glob Heal.* 2017;13(1):50.
- 17 Njelesani J, Stevens M, Cleaver S, Mwambwa L, Nixon S. International Research

**Supplement to:** Larson CP, Plamondon KM, Dubent L, et al. The Equity Tool for valuing global health partnerships. *Glob Health Sci Pract.* 2022;10(2): e2100316. <https://doi.org/10.9745/GHSP-D-21-00316>

- Partnerships in Occupational Therapy: A Canadian-Zambian Case Study. *Occup Ther Int.* 2013;20(2):75–84.
- 18 Pattberg P, Widerberg O. Transnational multistakeholder partnerships for sustainable development: Conditions for success. *Ambio* 2016;45(1):42–51 doi:10.1007/s13280-015-0684-2
- 19 Perez-Escamilla R. Innovative healthy lifestyles school-based public-private partnerships designed to curb the childhood obesity epidemic globally: Lessons learned from the Mondelez International Foundation. *Food Nutr Bull* 2018;39(1S):S3–21 doi:10.1177/0379572118767690
- 20 Ramaswamy R, Kallam B, Kopic D, et al. Global health partnerships: Building multi-national collaborations to achieve lasting improvements in maternal and neonatal health. *Globalization Health* 2016;12(1):22 doi:10.1186/s12992-016-0159-7
- 21 Ridde V, Capelle F. La recherche en santé mondiales et les défis des partenariats Nord-Sud. *Can J Public Health* 2011;102(2):152–6.
- 22 Sandwell R, Bonser D, Hebert E, et al. Stronger together: midwifery twinning between Tanzania and Canada. *Globalization Health* 2018;14:123 doi:10.1186/s12992-018-0442-x
- 23 Sriharan A, Harris J, Davis D, et al. Global health partnerships for continuing medical education: Lessons from successful partnerships. *Health Sys Reform* 2016;2(3):241-253.
- 24 Steenhoff AP, Crouse HL, Lukolyo H, et al. Partnerships for Global Child Health. *Pediatrics* 2017;140(4):10.
- 25 Storr C, MacLachlan J, Krishna D, et al. Building sustainable fieldwork partnerships between Canada and India: Finding common goals through evaluation. *World Fed Occup Ther Bull* 2018;74(1):34–43 doi:10.1080/14473828.2018.1432312
- 26 Thiessen J, Bagoi A, Homer C, et al. Qualitative evaluation of a public private partnership for reproductive health training in Papua New Guinea. *Rural Remote Health* 2018;18:4608 doi:10.22605/RRH4608
- 27 Underwood M, Gleeson J, Konnert C, et al. Global host partner perspectives: Utilizing a conceptual model to strengthen collaboration with host partners for international nursing student placements. *Public Health Nurs* 2016;33(4):351–9 doi:10.1111/phn.12258
- 28 Upvall MJ, Leffers JM. Revising a conceptual model of partnership and sustainability in global health. *Public Health Nurs* 2018;35(3):228–37 doi:10.1111/phn.12396
- 29 Yarmoshuk AN, Guantai AN, Mwangi M, et al. What makes international global health university partnerships higher-value? An examination of partnership types and activities favoured at four East African universities. *Ann Glob Health* 2018;84(1):139-50 doi:10.29024/aogh.20
- 30 Yassi A, O’Hara LM, Engelbrecht MC, et al. Considerations for preparing a randomized population health intervention trial: lessons from a South African-Canadian partnership to improve the health of health workers. *Glob Health Action* 2014;7:23594 doi:10.3402/gha.v7.23594
