# Supplementary material for: The Equity Tool for Valuing Global Health Partnerships
Source: PubMed Central journal article supplement (PMC9053142; doi:10.9745/ghsp-d-21-00316), 2022-04-28
Supplement: 21-00316-Larson-Supplement5.pdf [file 21-00316-Larson-Supplement5.pdf]

**Supplement to:** Larson CP, Plamondon KM, Dubent L, et al. The Equity Tool for valuing global health partnerships. *Glob Health Sci Pract.* 2022;10(2): e2100316. <https://doi.org/10.9745/GHSP-D-21-00316>

**Supplement 5.** Recommended background references for essential topics in support of the application of the EQT

### **Principles of equity, power and privilege**

Plamondon KM, Bisung E. The CCGHR principles for global health research: centering equity in research, knowledge translation, and practice. *Soc Sci Med* 2019;239, 112530.

Nixon S. The coin model of privilege and critical allyship: implications for health. *BMC Public Health* 2019;19:1637. <https://doi.org/10.1186/s12889-7884-9>

### **Core shared values among partners**

WHO World Health Report 2003. Core values for global health partnership. <https://www.who.int/whr/2003/overview/en/index2.html>

Eichbaum QG, Adams LV, Evert J, *et al.* Decolonizing global health education: rethinking institutional partnership and approaches. *Acad Med* 2020. doi:10.1097/ACM.0000000000003473

CCGHR (Canadian Coalition for Global Health Research). Partnership Assessment Tool. Ottawa, Canada: CCGHR 2009. Accessed February 17, 2021 at <https://www.ccghr.ca/resources/partnerships-and-networking/partnership-assessment-tool/>

### **Human rights and sustainability**

WHO. Human rights and health. 2017. <https://www.who.int/news-room/fact-sheets/detail/human-rights-and-health>

### **Gender equity guidelines**

WHO. 10 key issues in ensuring gender equity in the global health workforce. 2019. <https://www.who.int/news-room/feature-stories/detail/10-key-issues-in-ensuring-gender-equity-in-the-global-health-workforce>

Government of Canada. Feminist International Assistance Gender Equality Toolkit for Projects. 2019. [https://www.international.gc.ca/world-monde/funding-financement/gender\\_equality\\_toolkit-trousse\\_outils\\_egalite\\_genres.aspx?lang=eng](https://www.international.gc.ca/world-monde/funding-financement/gender_equality_toolkit-trousse_outils_egalite_genres.aspx?lang=eng)
